# Supplementary material
Source: publisher figshare collection journal article supplement (https://acs.figshare.com/ndownloader/files/4601485)
Supplement: Supplementary file 1 [file 4601485]

#-------------------------------------------------------------------------
#1    Global data block identification for start of deposition
 
data_global

_audit_update_record
;
2008-04-08 # Formatted by publCIF
;
 
#
#-------------------------------------------------------------------------
#2    Person making the deposition
#
_publ_contact_author_name      'Carsten Strohmann'
_publ_contact_author_address
;
Institut fuer Anorganische Chemie
Universitaet Wuerzburg
Am Hubland
97074 Wuerzburg
Germany
;
_publ_contact_author_email       mail@carsten-strohmann.de
_publ_contact_author_fax         '0049 931 888 4605'
_publ_contact_author_phone       '0049 931 888 4613'
 
#-------------------------------------------------------------------------
#3    Publication details
#
#     Provide these details if the structure has been published,
#     accepted or submitted for publication
#
#     The CCDC journal deposition number, eg. 182/357,
#     should be included only if it has been assigned by the journal
#
loop_
_publ_author_name
 
'Viktoria H. Gessner, Carsten Strohmann' 
 
_journal_name_full                 'Journal of the American Chemical Society'
_journal_volume                    ?
_journal_page_first                ?
_journal_page_last                 ?
_journal_year                      ?
_ccdc_journal_depnumber            ?
#
#-------------------------------------------------------------------------
#4    Chemical and physical data
#
#     Note that the units for melting point are Kelvin
#     The compound_id is the identifier for the compound in the published
#       paper, eg. 4a, II, etc.
#     Provide a brief description of any significant biological activity,
#       eg. antimalarial activity
#     If the compound exhibits polymorphism provide brief details,
#       eg. monoclinic form, low-temperature phase, etc.
#     For chemdiag  leave blank - no longer necessary
 
_ccdc_compound_id                  ?
_ccdc_biological_activity          ?
_ccdc_polymorph                    ?
 
_ccdc_chemdiag_type                ?
_ccdc_chemdiag_records
;
?
;
#
#-------------------------------------------------------------------------
#5    Other data relating to the structure determination and refinement
#
#     Record the radiation type if not X-rays, eg. neutron
#     Record the temperature of the data collection (Kelvin)
#       if not room-temperature
#     Record R_squared if this is the only reliability factor given by
#       your refinement program
#     Describe briefly any disorder, eg. t-Butyl C31-33 disordered over
#       two sites with occupancies 0.6 and 0.4
#     Under ccdc_comments record any other important information
 
_ccdc_temp_data_collection          ?
_ccdc_ls_R_squared                  ?
_ccdc_disorder                      ?
_ccdc_comments
;
?
;
#-------------------------------------------------------------------------
#6    Include your "standard" CIF file here
#     It should contain the following data items:
#       unit cell parameters and volume, z value, space group symbol,
#       R-factor(s), atomic coordinates with standard deviations,
#       occupancy factors, bond lengths and bond angles
#     Other data items may be present but will not necessarily be
#       included in the Cambridge Structural Database
#
#     Do NOT include structure factors
#
#
#-------------------------------------------------------------------------
#SUBMISSION INFORMATION
#
#     For a journal send the form to the address specified by the journal
#
#     For a private communication to the CCDC send the form to the address
#       deposit@ccdc.cam.ac.uk
#
#     For up-to-date information on deposition procedures, check the website
#       http://www.ccdc.cam.ac.uk/
 
data_ch240907
 
_audit_creation_date                    2008-04-06T12:05:34-00:00
_audit_creation_method                  'WinGX routine CIF_UPDATE'
 
#----------------------------------------------------------------------------#
#                   CHEMICAL INFORMATION                                     #
#----------------------------------------------------------------------------#
 
_chemical_name_systematic
;
 ?
;
_chemical_formula_sum                   'C32 H76 Li4 N8'
_chemical_formula_weight                600.77
 
#----------------------------------------------------------------------------#
#                   UNIT CELL INFORMATION                                    #
#----------------------------------------------------------------------------#
 
_symmetry_cell_setting                  triclinic
_symmetry_space_group_name_H-M          'P -1'
loop_
    _symmetry_equiv_pos_as_xyz
'x, y, z'
'-x, -y, -z'
 
_cell_length_a                          9.0546(18)
_cell_length_b                          14.205(3)
_cell_length_c                          17.048(4)
_cell_angle_alpha                       107.979(5)
_cell_angle_beta                        97.871(5)
_cell_angle_gamma                       102.869(6)
_cell_volume                            1982.6(7)
_cell_formula_units_Z                   2
_cell_measurement_temperature           173(2)
 
#----------------------------------------------------------------------------#
#                   CRYSTAL INFORMATION                                      #
#----------------------------------------------------------------------------#
 
_exptl_crystal_size_max                 0.4
_exptl_crystal_size_mid                 0.2
_exptl_crystal_size_min                 0.2
_exptl_crystal_density_diffrn           1.006
_exptl_crystal_density_method           'not measured'
_exptl_crystal_F_000                    672
_exptl_special_details
;
 ?
;
 
#----------------------------------------------------------------------------#
#                   ABSORPTION CORRECTION                                    #
#----------------------------------------------------------------------------#
 
_exptl_absorpt_coefficient_mu           0.059
_exptl_absorpt_correction_type          none
 
#----------------------------------------------------------------------------#
#                   DATA COLLECTION                                          #
#----------------------------------------------------------------------------#
 
_diffrn_ambient_temperature             173(2)
_diffrn_radiation_wavelength            0.71073
_diffrn_radiation_type                  MoK\a
_diffrn_radiation_monochromator         graphite
_diffrn_measurement_device_type         'Bruker APEX-CCD'
_diffrn_measurement_method              omega-scans
_diffrn_reflns_av_R_equivalents         0.0549
_diffrn_reflns_av_unetI/netI            0.0616
_diffrn_reflns_number                   18770
_diffrn_reflns_limit_h_min              -10
_diffrn_reflns_limit_h_max              10
_diffrn_reflns_limit_k_min              -16
_diffrn_reflns_limit_k_max              16
_diffrn_reflns_limit_l_min              -20
_diffrn_reflns_limit_l_max              20
_diffrn_reflns_theta_min                1.29
_diffrn_reflns_theta_max                25
_diffrn_reflns_theta_full               25
_diffrn_measured_fraction_theta_full
                                        0.996
_diffrn_measured_fraction_theta_max
                                        0.996
_reflns_number_total                    6953
_reflns_number_gt                       4439
_reflns_threshold_expression            >2sigma(I)
 
#----------------------------------------------------------------------------#
#                   COMPUTER PROGRAMS USED                                   #
#----------------------------------------------------------------------------#
 
_computing_data_collection              'SMART 5.622 (Bruker AXS, 2001)'
_computing_cell_refinement              'SAINTPLUS 6.02 (Bruker AXS, 1999)'
_computing_data_reduction               'SAINTPLUS 6.02 (Bruker AXS, 1999)'
_computing_structure_solution           'SHELXS-90 (Sheldrick, 1990)'
_computing_structure_refinement         'SHELXL-97 (Sheldrick, 1997)'
_computing_molecular_graphics           'Ortep-3 V1.073 (Farrugia, 2001)'
_computing_publication_material         'SHELXL-97 (Sheldrick, 1997)'
 
#----------------------------------------------------------------------------#
#                   REFINEMENT INFORMATION                                   #
#----------------------------------------------------------------------------#
 
_refine_special_details
;
 Refinement of F^2^ against ALL reflections.  The weighted R-factor wR and
 goodness of fit S are based on F^2^, conventional R-factors R are based
 on F, with F set to zero for negative F^2^. The threshold expression of
 F^2^ > 2sigma(F^2^) is used only for calculating R-factors(gt) etc. and is
 not relevant to the choice of reflections for refinement.  R-factors based
 on F^2^ are statistically about twice as large as those based on F, and R-
 factors based on ALL data will be even larger.
;
_refine_ls_structure_factor_coef        Fsqd
_refine_ls_matrix_type                  full
_refine_ls_weighting_scheme             calc
_refine_ls_weighting_details
         'calc w=1/[\s^2^(Fo^2^)+(0.0901P)^2^+0.1272P] where P=(Fo^2^+2Fc^2^)/3'
_atom_sites_solution_primary            direct
_atom_sites_solution_secondary          difmap
_atom_sites_solution_hydrogens          geom
_refine_ls_hydrogen_treatment           riding
_refine_ls_extinction_method            none
_refine_ls_number_reflns                6953
_refine_ls_number_parameters            409
_refine_ls_number_restraints            0
_refine_ls_R_factor_all                 0.1042
_refine_ls_R_factor_gt                  0.0698
_refine_ls_wR_factor_ref                0.1903
_refine_ls_wR_factor_gt                 0.1719
_refine_ls_goodness_of_fit_ref          1.032
_refine_ls_restrained_S_all             1.032
_refine_ls_shift/su_max                 0
_refine_ls_shift/su_mean                0
_refine_diff_density_max                0.646
_refine_diff_density_min                -0.27
_refine_diff_density_rms                0.039
 
#----------------------------------------------------------------------------#
#                   ATOMIC TYPES, COORDINATES AND THERMAL PARAMETERS         #
#----------------------------------------------------------------------------#
 
loop_
    _atom_type_symbol
    _atom_type_description
    _atom_type_scat_dispersion_real
    _atom_type_scat_dispersion_imag
    _atom_type_scat_source
C C 0.0033 0.0016 'International Tables Vol C Tables 4.2.6.8 and 6.1.1.4'
H H 0 0 'International Tables Vol C Tables 4.2.6.8 and 6.1.1.4'
Li Li -0.0003 0.0001 'International Tables Vol C Tables 4.2.6.8 and 6.1.1.4'
N N 0.0061 0.0033 'International Tables Vol C Tables 4.2.6.8 and 6.1.1.4'
 
loop_
    _atom_site_label
    _atom_site_type_symbol
    _atom_site_fract_x
    _atom_site_fract_y
    _atom_site_fract_z
    _atom_site_U_iso_or_equiv
    _atom_site_adp_type
    _atom_site_occupancy
    _atom_site_symmetry_multiplicity
    _atom_site_calc_flag
    _atom_site_refinement_flags
    _atom_site_disorder_assembly
    _atom_site_disorder_group
C1 C 0.5414(3) 1.2611(2) 0.17566(19) 0.0641(8) Uani 1 1 d . . .
H1A H 0.5766 1.3295 0.2215 0.077 Uiso 1 1 calc R . .
H1B H 0.4462 1.2593 0.1382 0.077 Uiso 1 1 calc R . .
C2 C 0.6664(4) 1.2524(3) 0.1246(2) 0.0825(10) Uani 1 1 d . . .
H2A H 0.7657 1.2639 0.1623 0.124 Uiso 1 1 calc R . .
H2B H 0.6766 1.3042 0.0973 0.124 Uiso 1 1 calc R . .
H2C H 0.6372 1.1833 0.0813 0.124 Uiso 1 1 calc R . .
C3 C 0.6339(3) 1.1807(2) 0.27344(19) 0.0652(8) Uani 1 1 d . . .
H3A H 0.7181 1.1708 0.2431 0.078 Uiso 1 1 calc R . .
H3B H 0.6028 1.121 0.2918 0.078 Uiso 1 1 calc R . .
C4 C 0.6967(3) 1.2771(2) 0.3507(2) 0.0796(9) Uani 1 1 d . . .
H4A H 0.7412 1.3354 0.3338 0.119 Uiso 1 1 calc R . .
H4B H 0.7774 1.2677 0.3897 0.119 Uiso 1 1 calc R . .
H4C H 0.6123 1.291 0.3787 0.119 Uiso 1 1 calc R . .
C5 C 0.4327(3) 1.0785(2) 0.14829(18) 0.0619(7) Uani 1 1 d . . .
H5A H 0.5175 1.0469 0.1352 0.074 Uiso 1 1 calc R . .
H5B H 0.3822 1.086 0.0961 0.074 Uiso 1 1 calc R . .
C6 C 0.3135(3) 1.00650(19) 0.17465(18) 0.0587(7) Uani 1 1 d . . .
H6A H 0.2759 0.9387 0.1281 0.07 Uiso 1 1 calc R . .
H6B H 0.367 0.9958 0.2245 0.07 Uiso 1 1 calc R . .
C7 C 0.0995(3) 1.0620(2) 0.12546(16) 0.0560(7) Uani 1 1 d . . .
H7A H 0.0978 1.0086 0.0716 0.067 Uiso 1 1 calc R . .
H7B H 0.1578 1.1296 0.125 0.067 Uiso 1 1 calc R . .
C8 C -0.0650(3) 1.0633(2) 0.13115(17) 0.0583(7) Uani 1 1 d . . .
H8D H -0.1274 0.9936 0.1228 0.087 Uiso 1 1 calc R . .
H8E H -0.1095 1.0867 0.0874 0.087 Uiso 1 1 calc R . .
H8F H -0.0648 1.1104 0.187 0.087 Uiso 1 1 calc R . .
C9 C 0.1491(3) 1.3648(2) 0.24722(17) 0.0563(7) Uani 1 1 d . . .
H9A H 0.0957 1.4145 0.2764 0.068 Uiso 1 1 calc R . .
H9B H 0.0679 1.3023 0.2082 0.068 Uiso 1 1 calc R . .
C10 C 0.2444(4) 1.4118(2) 0.19540(19) 0.0707(8) Uani 1 1 d . . .
H10A H 0.3145 1.4792 0.2319 0.106 Uiso 1 1 calc R . .
H10B H 0.1749 1.4204 0.1503 0.106 Uiso 1 1 calc R . .
H10C H 0.3055 1.3663 0.1703 0.106 Uiso 1 1 calc R . .
C11 C 0.3719(3) 1.42281(19) 0.36596(17) 0.0577(7) Uani 1 1 d . . .
H11A H 0.4429 1.4407 0.3302 0.069 Uiso 1 1 calc R . .
H11B H 0.4286 1.3987 0.4063 0.069 Uiso 1 1 calc R . .
C12 C 0.3360(4) 1.5210(2) 0.41655(19) 0.0746(9) Uani 1 1 d . . .
H12A H 0.2815 1.5469 0.3777 0.112 Uiso 1 1 calc R . .
H12B H 0.4333 1.5734 0.4497 0.112 Uiso 1 1 calc R . .
H12C H 0.2703 1.5058 0.4547 0.112 Uiso 1 1 calc R . .
C13 C 0.1312(3) 1.29989(19) 0.36045(16) 0.0542(7) Uani 1 1 d . . .
H13A H 0.0438 1.2416 0.3212 0.065 Uiso 1 1 calc R . .
H13B H 0.0876 1.3563 0.3881 0.065 Uiso 1 1 calc R . .
C14 C 0.2062(3) 1.26540(19) 0.42736(16) 0.0559(7) Uani 1 1 d . . .
H14A H 0.2815 1.3262 0.472 0.067 Uiso 1 1 calc R . .
H14B H 0.1252 1.2363 0.4537 0.067 Uiso 1 1 calc R . .
C15 C 0.3661(3) 1.1721(2) 0.46596(17) 0.0633(8) Uani 1 1 d . . .
H15A H 0.2885 1.1404 0.4928 0.076 Uiso 1 1 calc R . .
H15B H 0.4295 1.2394 0.5082 0.076 Uiso 1 1 calc R . .
C16 C 0.4702(4) 1.1034(2) 0.4421(2) 0.0748(9) Uani 1 1 d . . .
H16A H 0.4112 1.04 0.3951 0.112 Uiso 1 1 calc R . .
H16B H 0.509 1.086 0.4908 0.112 Uiso 1 1 calc R . .
H16C H 0.5582 1.1396 0.4248 0.112 Uiso 1 1 calc R . .
C17 C -0.4684(3) 0.6373(2) 0.13606(18) 0.0641(8) Uani 1 1 d . . .
H17A H -0.4732 0.6068 0.1809 0.077 Uiso 1 1 calc R . .
H17B H -0.3923 0.6127 0.1045 0.077 Uiso 1 1 calc R . .
C18 C -0.6275(4) 0.5953(3) 0.0753(2) 0.0911(11) Uani 1 1 d . . .
H18A H -0.7055 0.6172 0.1057 0.137 Uiso 1 1 calc R . .
H18B H -0.6551 0.5198 0.0526 0.137 Uiso 1 1 calc R . .
H18C H -0.6241 0.6219 0.0288 0.137 Uiso 1 1 calc R . .
C19 C -0.5082(3) 0.7935(2) 0.23031(18) 0.0626(7) Uani 1 1 d . . .
H19A H -0.6135 0.7754 0.1946 0.075 Uiso 1 1 calc R . .
H19B H -0.4675 0.8697 0.2524 0.075 Uiso 1 1 calc R . .
C20 C -0.5211(4) 0.7569(3) 0.30358(19) 0.0760(9) Uani 1 1 d . . .
H20A H -0.5777 0.6835 0.2824 0.114 Uiso 1 1 calc R . .
H20B H -0.5772 0.7962 0.3404 0.114 Uiso 1 1 calc R . .
H20C H -0.4169 0.7672 0.3358 0.114 Uiso 1 1 calc R . .
C21 C -0.3864(3) 0.8019(2) 0.11520(18) 0.0659(8) Uani 1 1 d . . .
H21A H -0.3466 0.8773 0.1457 0.079 Uiso 1 1 calc R . .
H21B H -0.4886 0.7882 0.078 0.079 Uiso 1 1 calc R . .
C22 C -0.2756(4) 0.7676(2) 0.06075(18) 0.0709(9) Uani 1 1 d . . .
H22A H -0.3234 0.6951 0.0227 0.085 Uiso 1 1 calc R . .
H22B H -0.2581 0.8106 0.0251 0.085 Uiso 1 1 calc R . .
C23 C -0.0315(5) 0.7201(2) 0.0598(2) 0.1028(14) Uani 1 1 d . . .
H23A H 0.0592 0.7205 0.0997 0.123 Uiso 1 1 calc R . .
H23B H -0.0934 0.6472 0.0305 0.123 Uiso 1 1 calc R . .
C24 C 0.0250(5) 0.7584(3) -0.0022(2) 0.1185(15) Uani 1 1 d . . .
H24A H -0.063 0.7584 -0.0427 0.178 Uiso 1 1 calc R . .
H24B H 0.0834 0.7142 -0.0322 0.178 Uiso 1 1 calc R . .
H24C H 0.0931 0.8289 0.0258 0.178 Uiso 1 1 calc R . .
C25 C 0.0097(3) 0.6255(2) 0.24272(18) 0.0641(8) Uani 1 1 d . . .
H25A H 0.0685 0.5953 0.2769 0.077 Uiso 1 1 calc R . .
H25B H 0.0856 0.6705 0.2236 0.077 Uiso 1 1 calc R . .
C26 C -0.0968(4) 0.5397(2) 0.1662(2) 0.0842(10) Uani 1 1 d . . .
H26A H -0.1576 0.487 0.1841 0.126 Uiso 1 1 calc R . .
H26B H -0.035 0.5089 0.1281 0.126 Uiso 1 1 calc R . .
H26C H -0.1672 0.5674 0.1367 0.126 Uiso 1 1 calc R . .
C27 C -0.1842(3) 0.6275(2) 0.3296(2) 0.0644(8) Uani 1 1 d . . .
H27A H -0.2662 0.577 0.281 0.077 Uiso 1 1 calc R . .
H27B H -0.2345 0.6743 0.3653 0.077 Uiso 1 1 calc R . .
C28 C -0.1196(4) 0.5692(2) 0.3811(2) 0.0805(10) Uani 1 1 d . . .
H28A H -0.08 0.5167 0.3449 0.121 Uiso 1 1 calc R . .
H28B H -0.2023 0.5357 0.4034 0.121 Uiso 1 1 calc R . .
H28C H -0.035 0.6176 0.4282 0.121 Uiso 1 1 calc R . .
C29 C 0.0436(3) 0.7743(2) 0.36675(18) 0.0600(7) Uani 1 1 d . . .
H29A H 0.1275 0.7479 0.3876 0.072 Uiso 1 1 calc R . .
H29B H -0.0076 0.7986 0.4138 0.072 Uiso 1 1 calc R . .
C30 C 0.1157(3) 0.8658(2) 0.34146(18) 0.0568(7) Uani 1 1 d . . .
H30A H 0.1915 0.9189 0.3915 0.068 Uiso 1 1 calc R . .
H30B H 0.1742 0.842 0.2979 0.068 Uiso 1 1 calc R . .
C31 C -0.0681(3) 0.9595(2) 0.37486(17) 0.0593(7) Uani 1 1 d . . .
H31A H 0.0109 0.9985 0.4282 0.071 Uiso 1 1 calc R . .
H31B H -0.1421 0.9035 0.3843 0.071 Uiso 1 1 calc R . .
C32 C -0.1535(3) 1.0300(2) 0.35346(19) 0.0646(8) Uani 1 1 d . . .
H32A H -0.0791 1.0906 0.3516 0.097 Uiso 1 1 calc R . .
H32B H -0.2122 1.052 0.3966 0.097 Uiso 1 1 calc R . .
H32C H -0.2253 0.9937 0.2982 0.097 Uiso 1 1 calc R . .
Li1 Li 0.3147(5) 1.1946(3) 0.2814(3) 0.0523(10) Uani 1 1 d . . .
Li2 Li 0.1554(5) 1.0527(3) 0.3124(3) 0.0523(10) Uani 1 1 d . . .
Li3 Li 0.0104(5) 0.9092(3) 0.1900(3) 0.0547(11) Uani 1 1 d . . .
Li4 Li -0.1612(5) 0.7755(3) 0.2241(3) 0.0519(10) Uani 1 1 d . . .
N1 N 0.4997(2) 1.18167(16) 0.21414(14) 0.0548(6) Uani 1 1 d . . .
N2 N 0.1786(2) 1.04119(14) 0.19547(13) 0.0478(5) Uani 1 1 d . . .
N3 N 0.2377(2) 1.33606(15) 0.31101(12) 0.0476(5) Uani 1 1 d . . .
N4 N 0.2854(2) 1.18933(15) 0.39440(13) 0.0504(5) Uani 1 1 d . . .
N5 N -0.4081(2) 0.75042(16) 0.17738(13) 0.0533(5) Uani 1 1 d . . .
N6 N -0.1289(3) 0.77575(16) 0.11068(13) 0.0591(6) Uani 1 1 d . . .
N7 N -0.0711(2) 0.68925(16) 0.29672(14) 0.0547(6) Uani 1 1 d . . .
N8 N 0.0080(2) 0.91453(14) 0.30887(12) 0.0469(5) Uani 1 1 d . . .
 
loop_
    _atom_site_aniso_label
    _atom_site_aniso_U_11
    _atom_site_aniso_U_22
    _atom_site_aniso_U_33
    _atom_site_aniso_U_23
    _atom_site_aniso_U_13
    _atom_site_aniso_U_12
C1 0.0581(17) 0.0636(17) 0.082(2) 0.0386(16) 0.0212(16) 0.0184(14)
C2 0.071(2) 0.092(2) 0.104(3) 0.056(2) 0.038(2) 0.0193(18)
C3 0.0510(16) 0.0713(19) 0.090(2) 0.0421(17) 0.0271(16) 0.0225(15)
C4 0.0571(19) 0.073(2) 0.102(2) 0.0346(19) 0.0037(18) 0.0082(16)
C5 0.0571(17) 0.0580(16) 0.0772(19) 0.0223(14) 0.0300(15) 0.0218(14)
C6 0.0600(17) 0.0458(14) 0.0708(18) 0.0189(13) 0.0204(14) 0.0144(13)
C7 0.0626(17) 0.0567(16) 0.0567(16) 0.0244(13) 0.0240(14) 0.0193(14)
C8 0.0594(17) 0.0562(16) 0.0602(16) 0.0229(13) 0.0149(14) 0.0136(13)
C9 0.0533(16) 0.0483(14) 0.0602(16) 0.0120(13) 0.0023(14) 0.0166(13)
C10 0.083(2) 0.0706(19) 0.0691(19) 0.0341(16) 0.0153(17) 0.0289(17)
C11 0.0540(16) 0.0543(16) 0.0613(16) 0.0249(13) 0.0059(14) 0.0062(13)
C12 0.086(2) 0.0472(16) 0.0700(19) 0.0119(14) -0.0024(17) 0.0027(15)
C13 0.0486(15) 0.0472(14) 0.0621(16) 0.0133(12) 0.0139(13) 0.0116(12)
C14 0.0599(17) 0.0480(14) 0.0528(15) 0.0142(12) 0.0184(13) 0.0032(13)
C15 0.0710(19) 0.0536(16) 0.0599(17) 0.0268(14) 0.0057(15) 0.0026(15)
C16 0.074(2) 0.075(2) 0.085(2) 0.0445(18) 0.0104(18) 0.0195(17)
C17 0.0659(18) 0.0564(16) 0.0653(18) 0.0215(14) 0.0180(15) 0.0060(14)
C18 0.083(2) 0.073(2) 0.090(2) 0.0239(19) 0.002(2) -0.0125(18)
C19 0.0483(16) 0.0636(17) 0.0724(19) 0.0218(15) 0.0076(14) 0.0154(14)
C20 0.068(2) 0.102(2) 0.0690(19) 0.0334(18) 0.0255(16) 0.0350(18)
C21 0.0595(18) 0.0653(18) 0.0674(18) 0.0310(15) 0.0018(15) 0.0033(15)
C22 0.084(2) 0.0584(17) 0.0514(16) 0.0157(14) 0.0146(16) -0.0106(16)
C23 0.157(4) 0.0526(18) 0.073(2) 0.0016(16) 0.055(2) -0.009(2)
C24 0.139(4) 0.092(3) 0.100(3) 0.016(2) 0.046(3) -0.001(3)
C25 0.0700(19) 0.0641(18) 0.080(2) 0.0397(16) 0.0326(17) 0.0321(16)
C26 0.102(3) 0.0578(18) 0.097(2) 0.0216(18) 0.041(2) 0.0273(18)
C27 0.0720(19) 0.0543(16) 0.082(2) 0.0350(15) 0.0347(16) 0.0211(15)
C28 0.107(3) 0.0637(18) 0.104(2) 0.0501(18) 0.059(2) 0.0396(19)
C29 0.0611(17) 0.0586(16) 0.0689(18) 0.0336(14) 0.0116(15) 0.0194(14)
C30 0.0498(15) 0.0559(16) 0.0664(17) 0.0277(14) 0.0117(14) 0.0102(13)
C31 0.0671(18) 0.0580(16) 0.0570(16) 0.0235(13) 0.0222(14) 0.0156(14)
C32 0.0642(18) 0.0551(16) 0.0755(19) 0.0194(14) 0.0245(16) 0.0183(14)
Li1 0.049(2) 0.044(2) 0.063(3) 0.019(2) 0.015(2) 0.0086(19)
Li2 0.059(3) 0.044(2) 0.052(2) 0.0199(19) 0.014(2) 0.006(2)
Li3 0.059(3) 0.049(2) 0.056(3) 0.019(2) 0.020(2) 0.009(2)
Li4 0.053(3) 0.046(2) 0.058(3) 0.020(2) 0.018(2) 0.011(2)
N1 0.0469(12) 0.0534(13) 0.0732(15) 0.0295(11) 0.0207(11) 0.0168(10)
N2 0.0480(12) 0.0448(11) 0.0544(12) 0.0218(10) 0.0155(10) 0.0117(10)
N3 0.0432(12) 0.0436(11) 0.0544(12) 0.0182(10) 0.0070(10) 0.0099(9)
N4 0.0542(13) 0.0451(11) 0.0502(12) 0.0185(10) 0.0095(10) 0.0091(10)
N5 0.0504(13) 0.0508(12) 0.0583(13) 0.0219(11) 0.0129(11) 0.0093(10)
N6 0.0666(15) 0.0478(12) 0.0532(13) 0.0098(10) 0.0225(12) 0.0031(11)
N7 0.0562(13) 0.0472(12) 0.0700(14) 0.0274(11) 0.0238(12) 0.0170(11)
N8 0.0514(12) 0.0434(11) 0.0507(12) 0.0208(9) 0.0168(10) 0.0134(10)
 
 
#----------------------------------------------------------------------------#
#                   MOLECULAR GEOMETRY                                       #
#----------------------------------------------------------------------------#
 
_geom_special_details
;
 All esds (except the esd in the dihedral angle between two l.s. planes)
 are estimated using the full covariance matrix.  The cell esds are taken
 into account individually in the estimation of esds in distances, angles
 and torsion angles; correlations between esds in cell parameters are only
 used when they are defined by crystal symmetry.  An approximate (isotropic)
 treatment of cell esds is used for estimating esds involving l.s. planes.
;
loop_
    _geom_bond_atom_site_label_1
    _geom_bond_atom_site_label_2
    _geom_bond_distance
    _geom_bond_site_symmetry_2
    _geom_bond_publ_flag
C1 N1 1.477(3) . ?
C1 C2 1.523(4) . ?
C3 N1 1.476(3) . ?
C3 C4 1.506(4) . ?
C5 N1 1.476(3) . ?
C5 C6 1.529(4) . ?
C6 N2 1.463(3) . ?
C7 N2 1.451(3) . ?
C7 C8 1.509(4) . ?
C9 N3 1.474(3) . ?
C9 C10 1.513(4) . ?
C11 N3 1.477(3) . ?
C11 C12 1.527(4) . ?
C13 N3 1.474(3) . ?
C13 C14 1.511(4) . ?
C14 N4 1.442(3) . ?
C14 Li1 2.781(5) . ?
C15 N4 1.450(3) . ?
C15 C16 1.509(4) . ?
C17 N5 1.476(3) . ?
C17 C18 1.526(4) . ?
C19 N5 1.464(3) . ?
C19 C20 1.503(4) . ?
C21 N5 1.473(3) . ?
C21 C22 1.516(4) . ?
C22 N6 1.436(4) . ?
C23 C24 1.434(5) . ?
C23 N6 1.501(4) . ?
C25 N7 1.472(3) . ?
C25 C26 1.506(4) . ?
C27 N7 1.481(3) . ?
C27 C28 1.525(4) . ?
C29 N7 1.475(3) . ?
C29 C30 1.531(3) . ?
C30 N8 1.459(3) . ?
C31 N8 1.454(3) . ?
C31 C32 1.492(4) . ?
Li1 N4 2.002(5) . ?
Li1 N1 2.164(5) . ?
Li1 N2 2.180(4) . ?
Li1 N3 2.207(5) . ?
Li1 Li2 2.448(6) . ?
Li2 N4 1.991(4) . ?
Li2 N2 1.993(5) . ?
Li2 N8 2.092(4) . ?
Li2 Li3 2.380(6) . ?
Li3 N6 1.975(5) . ?
Li3 N8 2.008(5) . ?
Li3 N2 2.103(5) . ?
Li3 Li4 2.445(6) . ?
Li4 N6 1.996(5) . ?
Li4 N8 2.149(5) . ?
Li4 N5 2.178(5) . ?
Li4 N7 2.191(5) . ?
 
loop_
    _geom_angle_atom_site_label_1
    _geom_angle_atom_site_label_2
    _geom_angle_atom_site_label_3
    _geom_angle
    _geom_angle_site_symmetry_1
    _geom_angle_site_symmetry_3
    _geom_angle_publ_flag
N1 C1 C2 116.7(2) . . ?
N1 C3 C4 114.3(2) . . ?
N1 C5 C6 112.9(2) . . ?
N2 C6 C5 116.1(2) . . ?
N2 C7 C8 112.1(2) . . ?
N3 C9 C10 115.2(2) . . ?
N3 C11 C12 116.6(2) . . ?
N3 C13 C14 114.2(2) . . ?
N4 C14 C13 113.0(2) . . ?
N4 C14 Li1 43.62(14) . . ?
C13 C14 Li1 71.06(16) . . ?
N4 C15 C16 113.2(2) . . ?
N5 C17 C18 117.2(3) . . ?
N5 C19 C20 114.3(2) . . ?
N5 C21 C22 113.9(2) . . ?
N6 C22 C21 112.0(2) . . ?
C24 C23 N6 117.6(3) . . ?
N7 C25 C26 114.0(2) . . ?
N7 C27 C28 116.4(2) . . ?
N7 C29 C30 113.3(2) . . ?
N8 C30 C29 116.4(2) . . ?
N8 C31 C32 112.6(2) . . ?
N4 Li1 N1 134.2(2) . . ?
N4 Li1 N2 102.53(19) . . ?
N1 Li1 N2 89.19(17) . . ?
N4 Li1 N3 88.27(18) . . ?
N1 Li1 N3 119.9(2) . . ?
N2 Li1 N3 126.4(2) . . ?
N4 Li1 Li2 51.97(15) . . ?
N1 Li1 Li2 124.4(2) . . ?
N2 Li1 Li2 50.62(14) . . ?
N3 Li1 Li2 115.3(2) . . ?
N4 Li1 C14 29.80(10) . . ?
N1 Li1 C14 152.2(2) . . ?
N2 Li1 C14 114.09(18) . . ?
N3 Li1 C14 58.98(13) . . ?
Li2 Li1 C14 68.13(16) . . ?
N4 Li2 N2 110.0(2) . . ?
N4 Li2 N8 140.8(2) . . ?
N2 Li2 N8 109.2(2) . . ?
N4 Li2 Li3 166.1(2) . . ?
N2 Li2 Li3 56.66(16) . . ?
N8 Li2 Li3 52.88(15) . . ?
N4 Li2 Li1 52.39(15) . . ?
N2 Li2 Li1 57.70(15) . . ?
N8 Li2 Li1 166.9(2) . . ?
Li3 Li2 Li1 114.0(2) . . ?
N6 Li3 N8 108.8(2) . . ?
N6 Li3 N2 142.6(2) . . ?
N8 Li3 N2 108.2(2) . . ?
N6 Li3 Li2 165.0(2) . . ?
N8 Li3 Li2 56.17(15) . . ?
N2 Li3 Li2 52.35(15) . . ?
N6 Li3 Li4 52.40(15) . . ?
N8 Li3 Li4 56.70(15) . . ?
N2 Li3 Li4 164.8(2) . . ?
Li2 Li3 Li4 112.6(2) . . ?
N6 Li4 N8 102.70(19) . . ?
N6 Li4 N5 88.14(19) . . ?
N8 Li4 N5 128.6(2) . . ?
N6 Li4 N7 127.2(2) . . ?
N8 Li4 N7 89.43(18) . . ?
N5 Li4 N7 123.3(2) . . ?
N6 Li4 Li3 51.59(15) . . ?
N8 Li4 Li3 51.34(14) . . ?
N5 Li4 Li3 114.7(2) . . ?
N7 Li4 Li3 122.1(2) . . ?
C5 N1 C3 109.7(2) . . ?
C5 N1 C1 110.8(2) . . ?
C3 N1 C1 112.1(2) . . ?
C5 N1 Li1 101.61(19) . . ?
C3 N1 Li1 107.2(2) . . ?
C1 N1 Li1 114.87(19) . . ?
C7 N2 C6 110.4(2) . . ?
C7 N2 Li2 136.6(2) . . ?
C6 N2 Li2 112.9(2) . . ?
C7 N2 Li3 99.25(19) . . ?
C6 N2 Li3 105.82(19) . . ?
Li2 N2 Li3 70.99(17) . . ?
C7 N2 Li1 102.89(19) . . ?
C6 N2 Li1 94.86(18) . . ?
Li2 N2 Li1 71.68(17) . . ?
Li3 N2 Li1 142.02(19) . . ?
C13 N3 C9 108.4(2) . . ?
C13 N3 C11 111.56(19) . . ?
C9 N3 C11 111.60(19) . . ?
C13 N3 Li1 92.15(18) . . ?
C9 N3 Li1 123.90(19) . . ?
C11 N3 Li1 107.52(18) . . ?
C14 N4 C15 107.2(2) . . ?
C14 N4 Li2 117.1(2) . . ?
C15 N4 Li2 107.7(2) . . ?
C14 N4 Li1 106.58(19) . . ?
C15 N4 Li1 139.2(2) . . ?
Li2 N4 Li1 75.65(18) . . ?
C19 N5 C21 109.7(2) . . ?
C19 N5 C17 112.1(2) . . ?
C21 N5 C17 111.7(2) . . ?
C19 N5 Li4 123.3(2) . . ?
C21 N5 Li4 95.12(19) . . ?
C17 N5 Li4 103.74(19) . . ?
C22 N6 C23 113.1(2) . . ?
C22 N6 Li3 122.2(2) . . ?
C23 N6 Li3 107.4(2) . . ?
C22 N6 Li4 107.9(2) . . ?
C23 N6 Li4 126.5(2) . . ?
Li3 N6 Li4 76.01(18) . . ?
C25 N7 C29 109.7(2) . . ?
C25 N7 C27 111.9(2) . . ?
C29 N7 C27 110.8(2) . . ?
C25 N7 Li4 106.32(19) . . ?
C29 N7 Li4 100.49(18) . . ?
C27 N7 Li4 116.9(2) . . ?
C31 N8 C30 109.3(2) . . ?
C31 N8 Li3 136.8(2) . . ?
C30 N8 Li3 113.8(2) . . ?
C31 N8 Li2 97.16(19) . . ?
C30 N8 Li2 102.85(19) . . ?
Li3 N8 Li2 70.94(17) . . ?
C31 N8 Li4 105.72(19) . . ?
C30 N8 Li4 97.26(18) . . ?
Li3 N8 Li4 71.96(18) . . ?
Li2 N8 Li4 142.43(19) . . ?
 
